# Supplementary material
Source: Springer Nature journal article supplement (https://www.springermedizin.de/resource/supplementary/12967_2011_716_MOESM3_ESM.pdf/9577334)

A

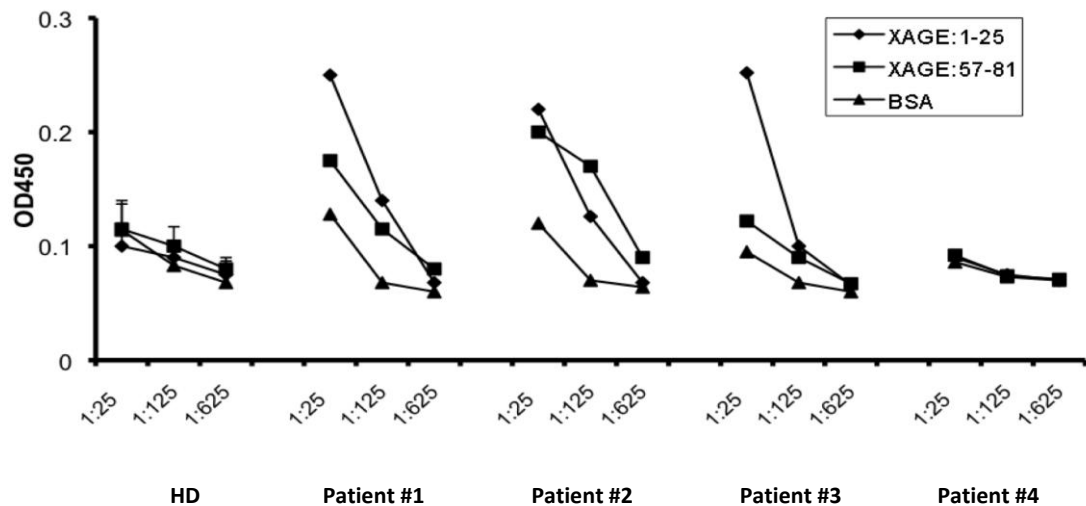

B

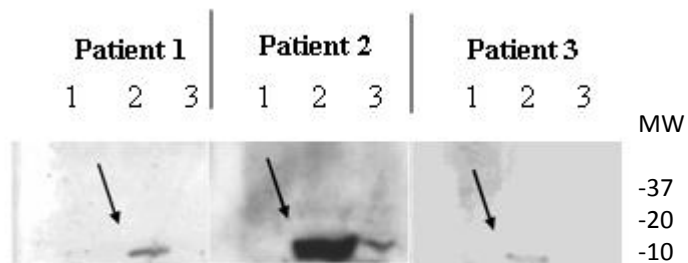

Supplement: MOESM3 [file 9577334]
